# Supplementary material for: An Examination of the Long-Term Neurodevelopmental Impact of Prenatal Zika Virus Infection in a Rat Model Using a High Resolution, Longitudinal MRI Approach
Source: MDPI journal article supplement (doi:10.3390/v13061123), 2021-06-11
Supplement: s1 [file s1]

## Supplementary material

**Table S1.** Average volumes (mm<sup>3</sup>) for the whole brain compared across groups for both methods of segmentation. The average volume  $\pm$  SD for each brain region at each age is listed.

| Segmentation Method | Time point | Mean $\pm$ SD        |                                   |                                  |
|---------------------|------------|----------------------|-----------------------------------|----------------------------------|
|                     |            | Mock                 | iZIKV                             | ZIKV                             |
| Automated           | PND2       | 354.04 $\pm$ 43.27   | 304.97 $\pm$ 40.28 <sup>*,b</sup> | 350.57 $\pm$ 23.03               |
|                     | PND16      | 1343.14 $\pm$ 53.47  | 1366.13 $\pm$ 44.77               | 1382.33 $\pm$ 58.46 <sup>*</sup> |
|                     | PND24      | 1579.23 $\pm$ 74.96  | 1569.66 $\pm$ 72.68               | 1581.49 $\pm$ 85.97              |
|                     | PND60      | 1991.82 $\pm$ 119.01 | 2008.24 $\pm$ 127.66              | 1972.08 $\pm$ 103.77             |
| Manual              | PND2       | 493.81 $\pm$ 54.21   | 370.70 $\pm$ 33.23 <sup>*,b</sup> | 427.57 $\pm$ 31.37 <sup>*</sup>  |
|                     | PND16      | 1502.35 $\pm$ 45.42  | 1465.72 $\pm$ 56.52 <sup>*</sup>  | 1458.32 $\pm$ 51.49 <sup>*</sup> |
|                     | PND24      | 1677.60 $\pm$ 42.99  | 1671.22 $\pm$ 71.05               | 1632.60 $\pm$ 64.27 <sup>*</sup> |
|                     | PND60      | 2128.35 $\pm$ 124.92 | 2147.50 $\pm$ 136.99              | 2078.42 $\pm$ 139.26             |

Significant differences compared with mock group\*, iZIKVa, or ZIKVb ( $p < 0.05$  by two-way ANOVA and Tukey post-hoc test).

**Table S2.** Average corrected volumes (mm<sup>3</sup>) for each individual ROI compared across groups for both methods of segmentation. The average volume  $\pm$  SD for each brain region at each age is listed.

| Brain Region | Segmentation Method | Time point | Mean $\pm$ SD    |                                 |                                |
|--------------|---------------------|------------|------------------|---------------------------------|--------------------------------|
|              |                     |            | Mock             | iZIKV                           | ZIKV                           |
| Cerebellum   | Automated           | P2         | 3.53 $\pm$ 0.37  | 3.36 $\pm$ 0.34                 | 3.33 $\pm$ 0.30                |
|              |                     | P16        | 13.06 $\pm$ 0.75 | 12.35 $\pm$ 0.63 <sup>*</sup>   | 12.30 $\pm$ 0.50 <sup>*</sup>  |
|              |                     | P24        | 13.48 $\pm$ 0.49 | 13.24 $\pm$ 0.96                | 13.22 $\pm$ 0.58               |
|              |                     | P60        | 15.39 $\pm$ 0.30 | 15.18 $\pm$ 0.45                | 15.24 $\pm$ 0.47               |
|              | Manual              | P2         | 8.03 $\pm$ 0.78  | 7.33 $\pm$ 0.77 <sup>*</sup>    | 7.91 $\pm$ 0.92                |
|              |                     | P16        | 14.15 $\pm$ 0.70 | 14.05 $\pm$ 0.43                | 13.89 $\pm$ 0.53               |
|              |                     | P24        | 14.75 $\pm$ 0.47 | 15.10 $\pm$ 0.52                | 14.60 $\pm$ 0.63 <sup>a</sup>  |
|              |                     | P60        | 14.55 $\pm$ 0.57 | 15.15 $\pm$ 0.65                | 14.71 $\pm$ 0.65               |
| Isocortex    | Automated           | P2         | 24.89 $\pm$ 1.87 | 24.30 $\pm$ 1.07                | 23.74 $\pm$ 1.25 <sup>*</sup>  |
|              |                     | P16        | 33.47 $\pm$ 1.29 | 32.40 $\pm$ 1.05 <sup>*</sup>   | 32.03 $\pm$ 1.06 <sup>*</sup>  |
|              |                     | P24        | 33.31 $\pm$ 1.11 | 32.95 $\pm$ 1.35                | 32.53 $\pm$ 1.28               |
|              |                     | P60        | 28.83 $\pm$ 0.56 | 28.83 $\pm$ 0.68                | 28.40 $\pm$ 0.86               |
|              | Manual              | P2         | 33.27 $\pm$ 1.85 | 30.23 $\pm$ 1.46 <sup>*,b</sup> | 33.39 $\pm$ 1.78               |
|              |                     | P16        | 34.92 $\pm$ 0.82 | 33.72 $\pm$ 0.85 <sup>*,b</sup> | 34.61 $\pm$ 0.82               |
|              |                     | P24        | 34.57 $\pm$ 0.75 | 34.00 $\pm$ 0.62                | 34.16 $\pm$ 0.86               |
|              |                     | P60        | 30.55 $\pm$ 0.56 | 30.21 $\pm$ 0.71                | 30.24 $\pm$ 0.86               |
| Hippocampus  | Automated           | P2         | 4.99 $\pm$ 0.56  | 5.01 $\pm$ 0.24                 | 5.02 $\pm$ 0.55                |
|              |                     | P16        | 5.42 $\pm$ 0.14  | 5.43 $\pm$ 0.19                 | 5.25 $\pm$ 0.21 <sup>*,a</sup> |
|              |                     | P24        | 5.42 $\pm$ 0.21  | 5.41 $\pm$ 0.27                 | 5.23 $\pm$ 0.28                |
|              |                     | P60        | 5.36 $\pm$ 0.13  | 5.39 $\pm$ 0.12                 | 5.24 $\pm$ 0.22 <sup>a</sup>   |
|              | Manual              | P2         | 2.35 $\pm$ 0.42  | 2.16 $\pm$ 0.23                 | 2.073 $\pm$ 0.33               |
|              |                     | P16        | 2.85 $\pm$ 0.30  | 2.87 $\pm$ 0.26                 | 3.18 $\pm$ 0.46 <sup>*,a</sup> |
|              |                     | P24        | 4.23 $\pm$ 0.45  | 4.36 $\pm$ 0.45                 | 4.45 $\pm$ 0.51                |
|              |                     | P60        | 4.23 $\pm$ 0.31  | 4.33 $\pm$ 0.45                 | 4.32 $\pm$ 0.38                |

Significant differences compared with mock group\*, iZIKVa, or ZIKVb ( $p < 0.05$  by two-way ANOVA and Tukey post-hoc test).

**Table S3.** Average corrected volumes (mm<sup>3</sup>) for each hippocampal subregion compared across groups. The average volume  $\pm$  SD for each brain region at each age is listed.

| Subregion | Age Point | Mean $\pm$ SD       |                     |                      |
|-----------|-----------|---------------------|---------------------|----------------------|
|           |           | Mock                | iZIKV               | ZIKV                 |
| CA1       | P2        | 0.7145 $\pm$ 0.1228 | 0.6520 $\pm$ 0.0934 | 0.6963 $\pm$ 0.1442  |
|           | P16       | 0.9096 $\pm$ 0.2288 | 0.9306 $\pm$ 0.2231 | 1.1544 $\pm$ 0.3811* |
|           | P24       | 1.4015 $\pm$ 0.2511 | 1.6014 $\pm$ 0.3027 | 1.6253 $\pm$ 0.3604  |
|           | P60       | 1.3787 $\pm$ 0.1447 | 1.4596 $\pm$ 0.1638 | 1.4655 $\pm$ 0.2357  |
| CA2       | P2        | 0.2166 $\pm$ 0.1758 | 0.1550 $\pm$ 0.0422 | 0.1464 $\pm$ 0.0324  |
|           | P16       | 0.1857 $\pm$ 0.0655 | 0.1747 $\pm$ 0.0724 | 0.1728 $\pm$ 0.0609  |
|           | P24       | 0.2262 $\pm$ 0.0509 | 0.1948 $\pm$ 0.0540 | 0.1919 $\pm$ 0.0467  |
|           | P60       | 0.2158 $\pm$ 0.0391 | 0.2131 $\pm$ 0.0578 | 0.1810 $\pm$ 0.0672  |
| CA3       | P2        | 0.6264 $\pm$ 0.1160 | 0.5873 $\pm$ 0.1290 | 0.5228 $\pm$ 0.0682* |
|           | P16       | 0.6653 $\pm$ 0.1009 | 0.6672 $\pm$ 0.0847 | 0.6778 $\pm$ 0.1250  |
|           | P24       | 0.8763 $\pm$ 0.1938 | 0.9176 $\pm$ 0.2554 | 0.9820 $\pm$ 0.2449  |
|           | P60       | 0.8549 $\pm$ 0.1383 | 0.9565 $\pm$ 0.1574 | 0.9366 $\pm$ 0.1571  |
| DG        | P2        | 0.6327 $\pm$ 0.1095 | 0.5884 $\pm$ 0.0609 | 0.5572 $\pm$ 0.0996  |
|           | P16       | 0.7115 $\pm$ 0.1362 | 0.7688 $\pm$ 0.1337 | 0.8378 $\pm$ 0.1694* |
|           | P24       | 1.1418 $\pm$ 0.1238 | 1.1410 $\pm$ 0.1492 | 1.1837 $\pm$ 0.1113  |
|           | P60       | 1.2438 $\pm$ 0.0818 | 1.1548 $\pm$ 0.0993 | 1.2188 $\pm$ 0.1354  |

Significant differences compared with mock group\*, iZIKV<sup>a</sup>, or ZIKV<sup>b</sup> ( $p < 0.05$  by two-way ANOVA and Tukey post-hoc test).

**Table S4.** Comparative analysis of ROI volumes (mm<sup>3</sup>) determined by automated and manual segmentation methods for each age point. The average uncorrected volume  $\pm$  SD for each segmentation method is listed for CB, CTX, HC, and WB regions.

| Age Point | ROI         | Mean $\pm$ SD        |                      | Pearson $r$ | $p$ -value |
|-----------|-------------|----------------------|----------------------|-------------|------------|
|           |             | Automated            | Manual               |             |            |
| P2        | Cerebellum  | 11.47 $\pm$ 1.62     | 33.79 $\pm$ 6.96     | 0.659***    | 5.91E-08   |
|           | Cortex      | 81.97 $\pm$ 10.66    | 140.97 $\pm$ 28.05   | 0.794***    | 7.85E-13   |
|           | Hippocampus | 16.80 $\pm$ 1.99     | 9.59 $\pm$ 2.54      | 0.377*      | 1.28E-02   |
|           | Whole Brain | 337.44 $\pm$ 42.31   | 432.97 $\pm$ 65.02   | 0.684***    | 1.16E-08   |
| P16       | Cerebellum  | 171.34 $\pm$ 7.77    | 207.24 $\pm$ 12.86   | 0.429***    | 8.61E-04   |
|           | Cortex      | 81.97 $\pm$ 10.66    | 508.40 $\pm$ 24.17   | 0.624***    | 2.14E-07   |
|           | Hippocampus | 444.71 $\pm$ 13.78   | 43.83 $\pm$ 5.78     | -0.027      | 8.44E-01   |
|           | Whole Brain | 1363.46 $\pm$ 54.29  | 1476.11 $\pm$ 53.94  | 0.223       | 9.51E-02   |
| P24       | Cerebellum  | 209.51 $\pm$ 8.96    | 245.45 $\pm$ 15.36   | 0.109       | 4.38E-01   |
|           | Cortex      | 519.87 $\pm$ 27.24   | 567.61 $\pm$ 26.03   | 0.346*      | 1.10E-02   |
|           | Hippocampus | 84.35 $\pm$ 5.00     | 72.24 $\pm$ 7.97     | 0.124       | 3.77E-01   |
|           | Whole Brain | 1576.83 $\pm$ 77.25  | 1658.45 $\pm$ 63.85  | 0.099       | 4.80E-01   |
| P60       | Cerebellum  | 303.77 $\pm$ 17.19   | 312.83 $\pm$ 22.94   | 0.363**     | 8.40E-03   |
|           | Cortex      | 570.35 $\pm$ 34.34   | 641.71 $\pm$ 42.10   | 0.587***    | 5.00E-06   |
|           | Hippocampus | 105.93 $\pm$ 7.04    | 90.64 $\pm$ 7.60     | 0.383**     | 5.00E-03   |
|           | Whole Brain | 1989.66 $\pm$ 115.16 | 2116.00 $\pm$ 134.72 | 0.465**     | 1.00E-03   |

Pearson correlation coefficients ( $r$ ) are reported with  $p$ -value (\* $p < 0.05$ , \*\* $p < 0.01$ , \*\*\* $p < 0.001$ ).

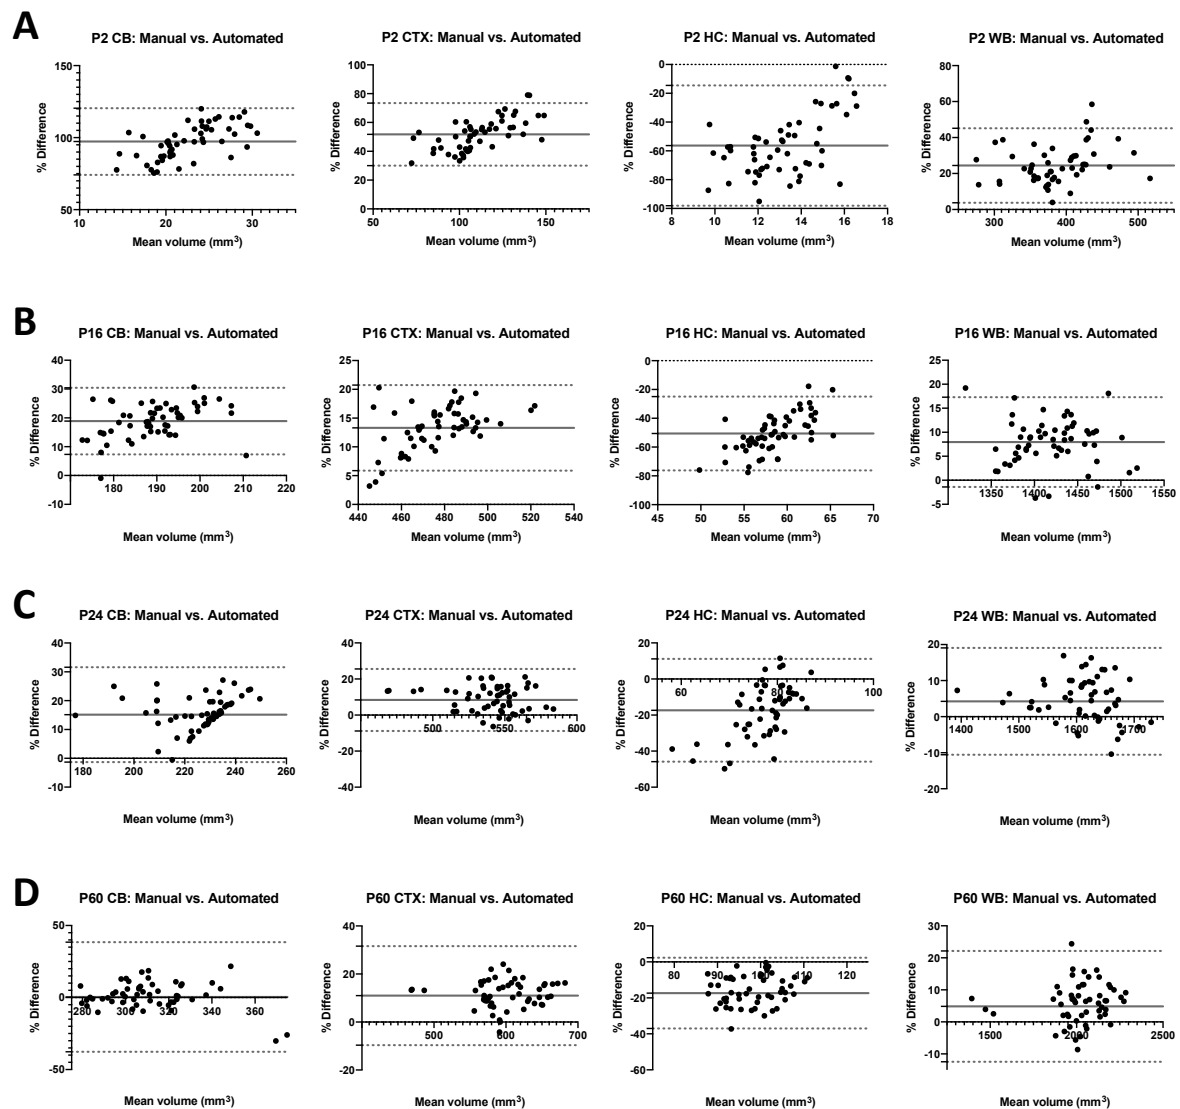

**Figure S1.** Bland-Altman plots comparing automated segmentation to manual segmentation. Percent volumetric difference between measurements using automated and manual segmentation was plotted against the average. Each brain structure, including the whole brain, was compared for postnatal day 2 (**A**), postnatal day 16 (**B**), postnatal day 24 (**C**), and postnatal day 60 (**D**). Solid line represents the mean and the dashed lined represent the 95% limits of agreement ( $\pm 1.96SD$ , indicated by the area between the dashed lines).
